# Supplementary material for: Variation in the biomolecular interactions of nickel(ii) hydrazone complexes upon tuning the hydrazide fragment
Source: Royal Society of Chemistry journal article supplement (doi:10.1039/c2dt30121k), 2012-01-01
Supplement: c2dt30121k.pdf [file c2dt30121k.pdf]

## Supplementary material for

### Variation in the biomolecular interactions of nickel(II) hydrazone complexes upon tuning the hydrazide fragment

**Paramasivam Krishnamoorthy,<sup>a</sup> Palanisamy Sathyadevi,<sup>a</sup> Rachel R. Butorac,<sup>b</sup> Alan H. Cowley,<sup>b</sup> Nattamai S.P. Bhuvanesh,<sup>c</sup> and Nallasamy Dharmaraj<sup>a,\*</sup>**

<sup>a</sup> *Department of Chemistry, Bharathiar University, Coimbatore - 641 046, India*

*E-mail address: dharmaraj@buc.edu.in; Tel.: +91 422 2428316; Fax: +91 422 2422387*

<sup>b</sup> *Department of Chemistry and Biochemistry, University of Texas at Austin, Austin, Texas 78712, U.S.A*

<sup>c</sup> *Department of Chemistry, Texas A&M University, College Station, TX 77843, U.S.A.*

## Figures

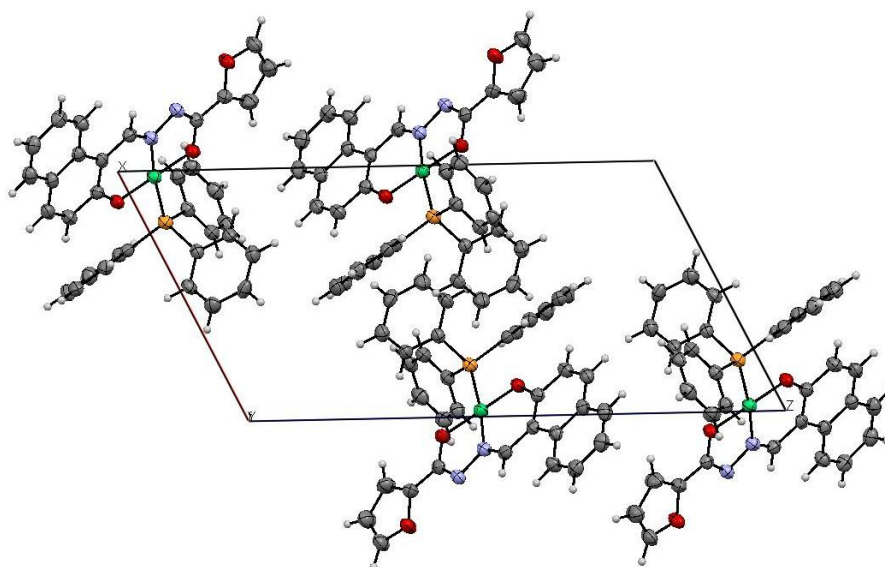

**Figure S1.** Unit cell packing diagram of the complex 4.

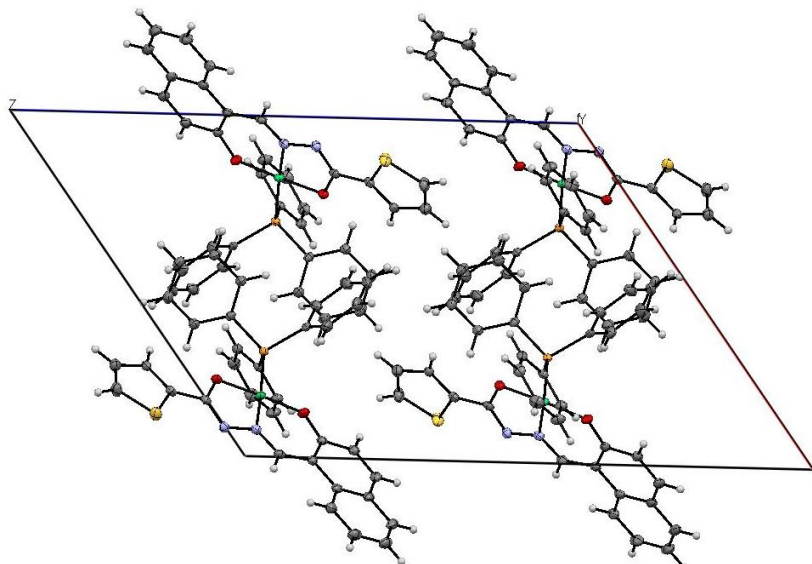

**Figure S2.** Unit cell packing diagram of the complex 5.

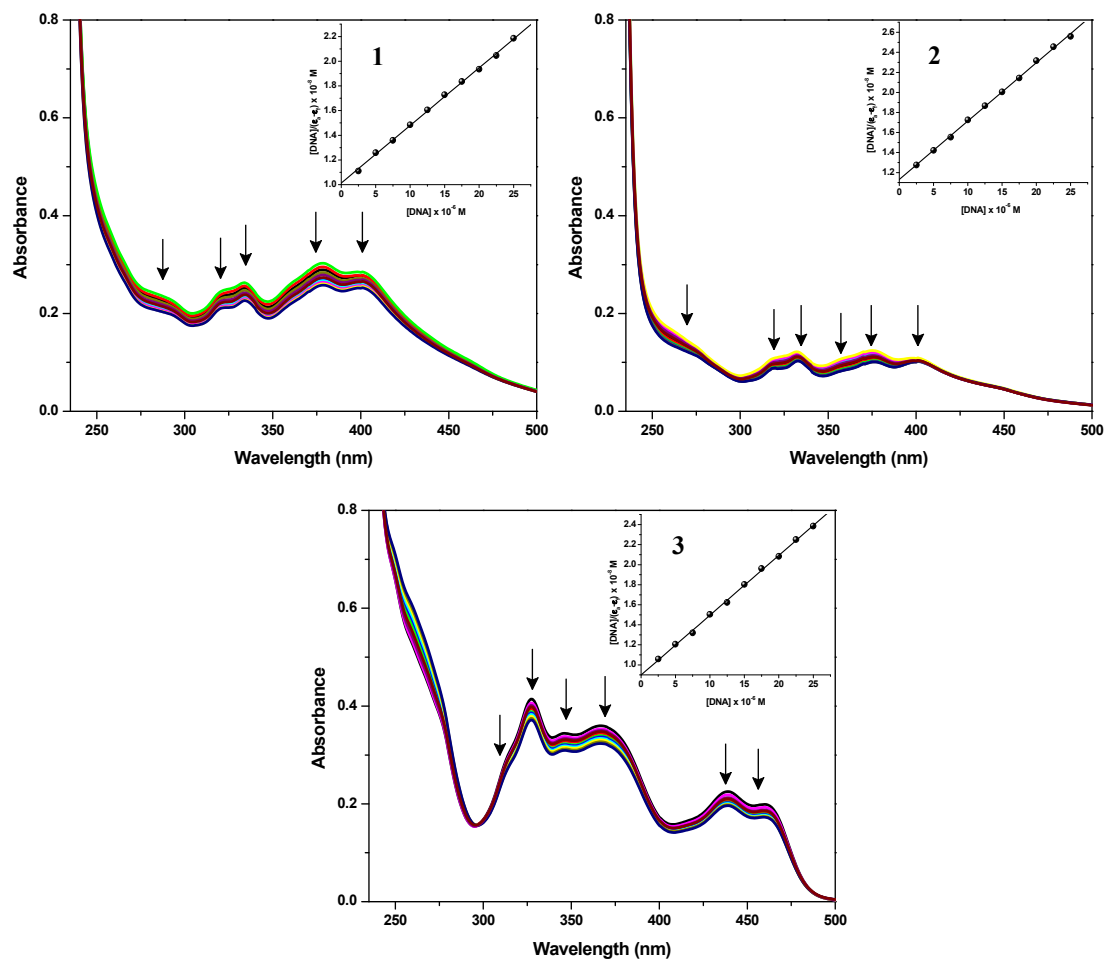

**Figure S3.** Electronic absorption spectra of ligands **1-3** (25  $\mu\text{M}$ ) in the absence and presence of increasing amounts of CT DNA (2.5, 5.0, 7.5, 10.0, 12.5, 15.0, 17.5 and 20.0, 22.5 and 25  $\mu\text{M}$ ). Arrows show the changes in absorbance as a function of increasing DNA concentration (Inset: Plot of  $[\text{DNA}]$  vs  $[\text{DNA}]/(\epsilon_a - \epsilon_f)$ ).

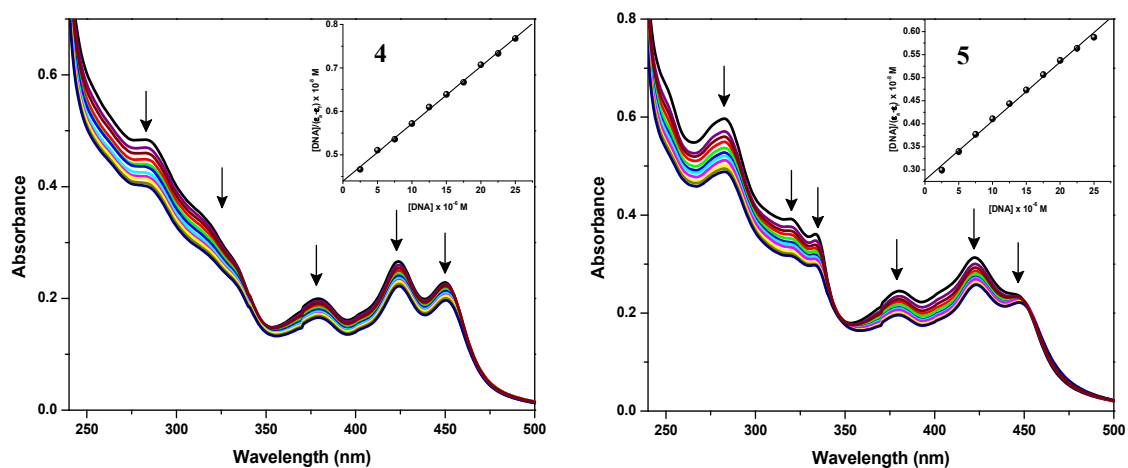

**Figure S4.** Electronic absorption spectra of complexes **4** and **5** (25  $\mu\text{M}$ ) in the absence and presence of increasing amounts of CT DNA (2.5, 5.0, 7.5, 10.0, 12.5, 15.0, 17.5 and 20.0, 22.5 and 25  $\mu\text{M}$ ). Arrows show the changes in absorbance as a function of increasing DNA concentration (Inset: Plot of  $[\text{DNA}]$  vs  $[\text{DNA}]/(\epsilon_a - \epsilon_f)$ ).

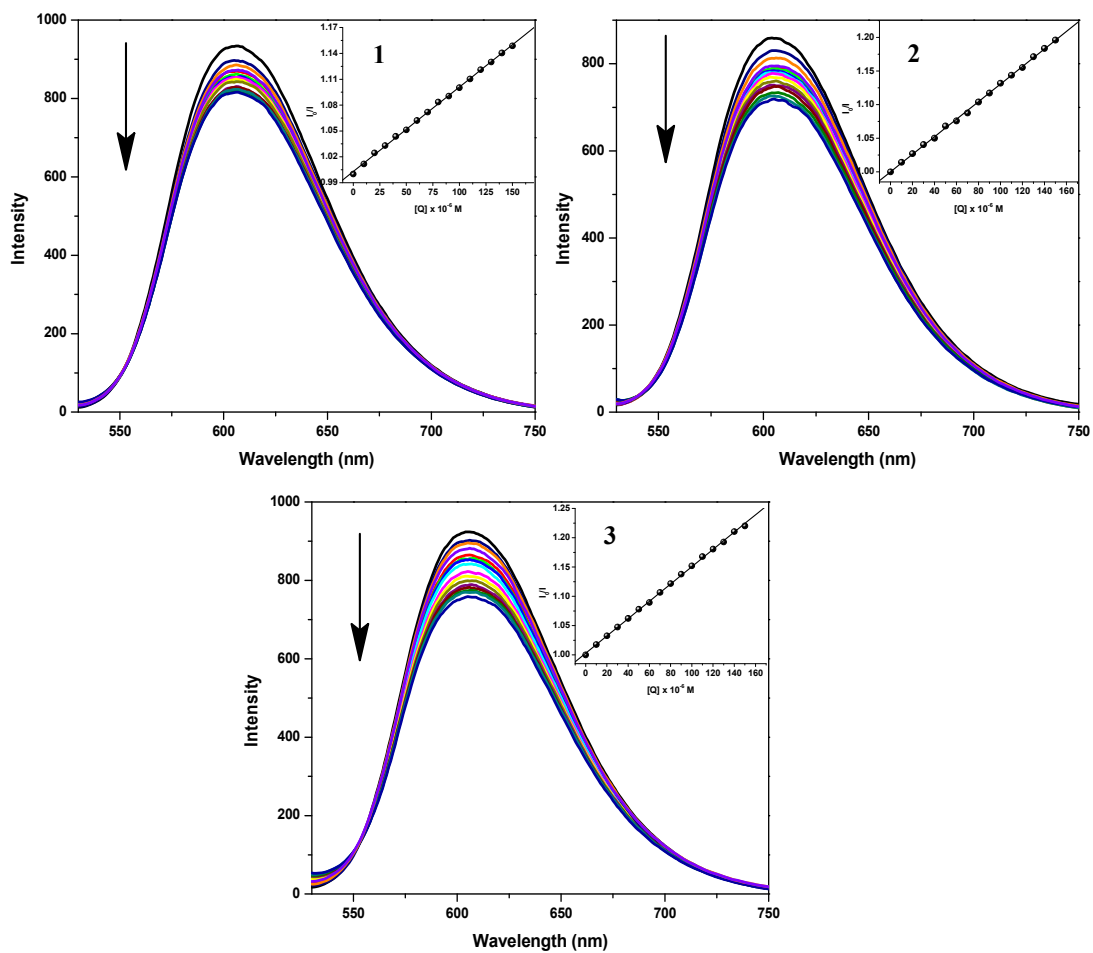

**Figure S5.** Emission spectra of DNA-EB, in the presence of 0, 10, 20, 30, 40, 50, 60, 70, 80, 90, 100, 110, 120, 130, 140 and 150  $\mu\text{M}$  of ligands **1-3**. Arrow indicates the change in the emission intensity as a function of ligand concentration (Inset: Stern-Volmer plot of the fluorescence titration data corresponding to the ligands).

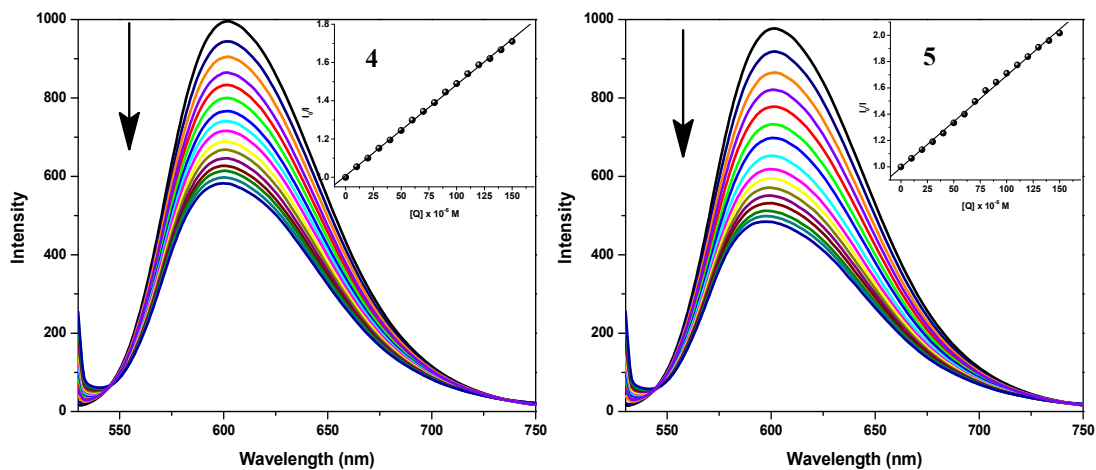

**Figure S6.** Emission spectra of DNA-EB, in the presence of 0, 10, 20, 30, 40, 50, 60, 70, 80, 90, 100, 110, 120, 130, 140 and 150  $\mu\text{M}$  of complexes **4** and **5**. Arrow indicates the change in the emission intensity as a function of complex concentration (Inset: Stern-Volmer plot of the fluorescence titration data corresponding to the complex).

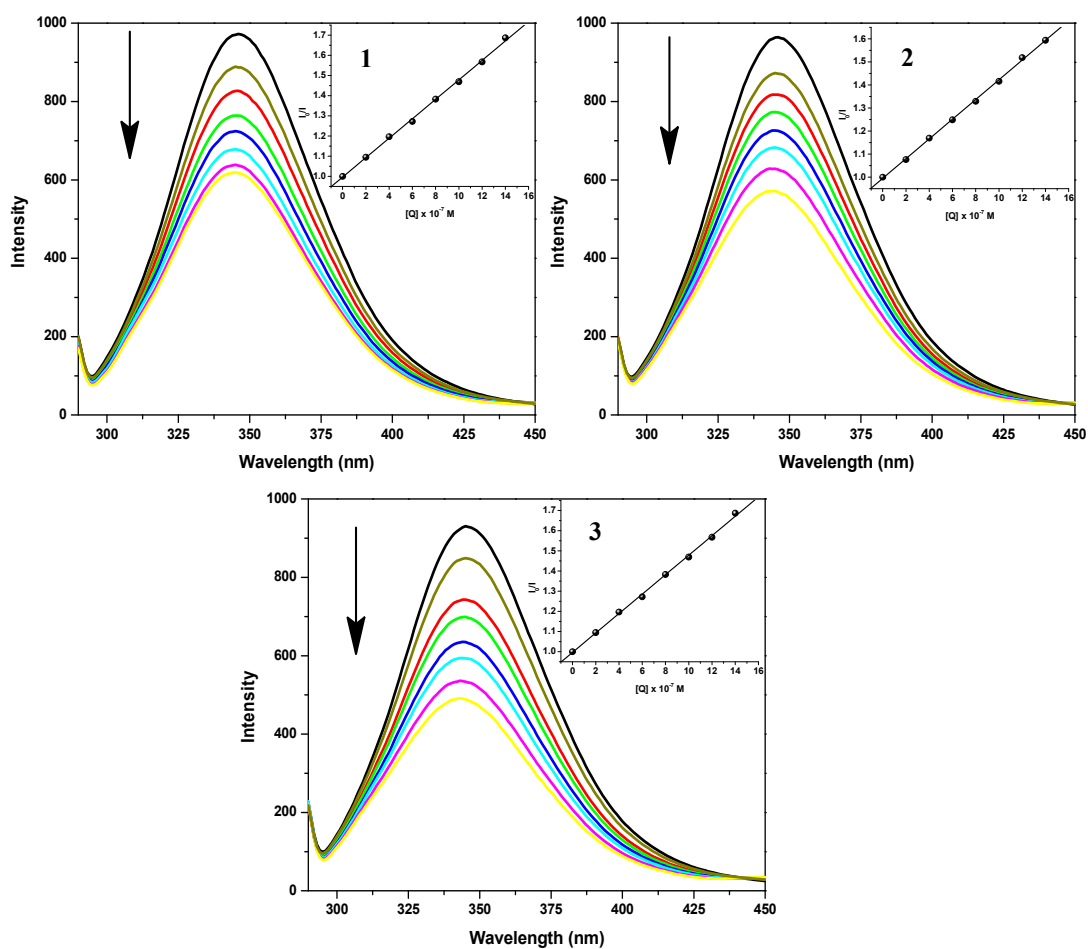

**Figure S7.** Emission spectra of BSA ( $1 \times 10^{-6}$  M;  $\lambda_{\text{exi}} = 280$  nm;  $\lambda_{\text{emi}} = 345$  nm) as a function of concentration of the ligands **1-3** ( $0, 2, 4, 6, 8, 10, 12$  and  $14 \times 10^{-7}$  M). Arrow indicates the effect of the ligands on the fluorescence emission of BSA (Inset: Plot between  $[Q]$  and  $I_0/I$ ).

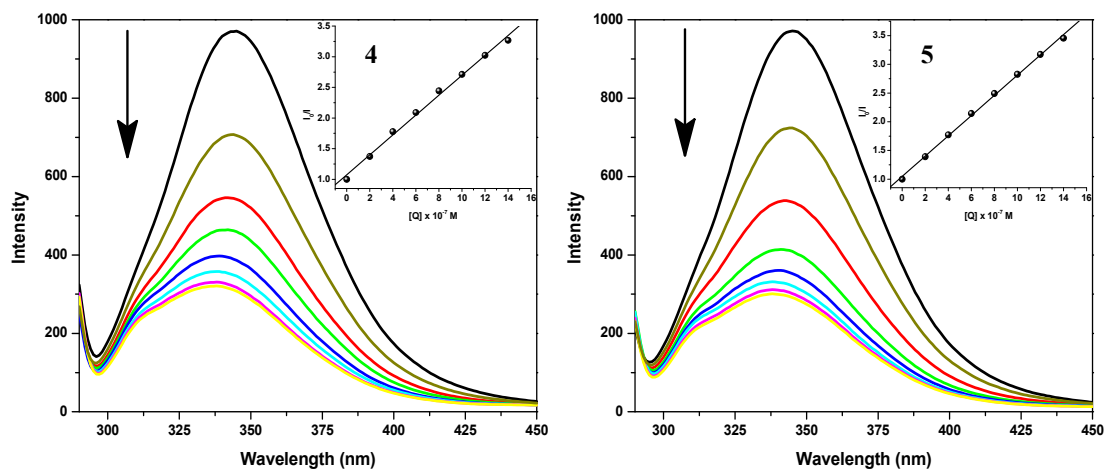

**Figure S8.** Emission spectra of BSA ( $1 \times 10^{-6}$  M;  $\lambda_{\text{exi}} = 280$  nm;  $\lambda_{\text{emi}} = 345$  nm) as a function of concentration of the complexes **4** and **5** ( $0, 2, 4, 6, 8, 10, 12$  and  $14 \times 10^{-7}$  M). Arrow indicates the effect of metal complexes **4** and **5** on the fluorescence emission of BSA (Inset: Plot between  $[Q]$  and  $I_0/I$ ).



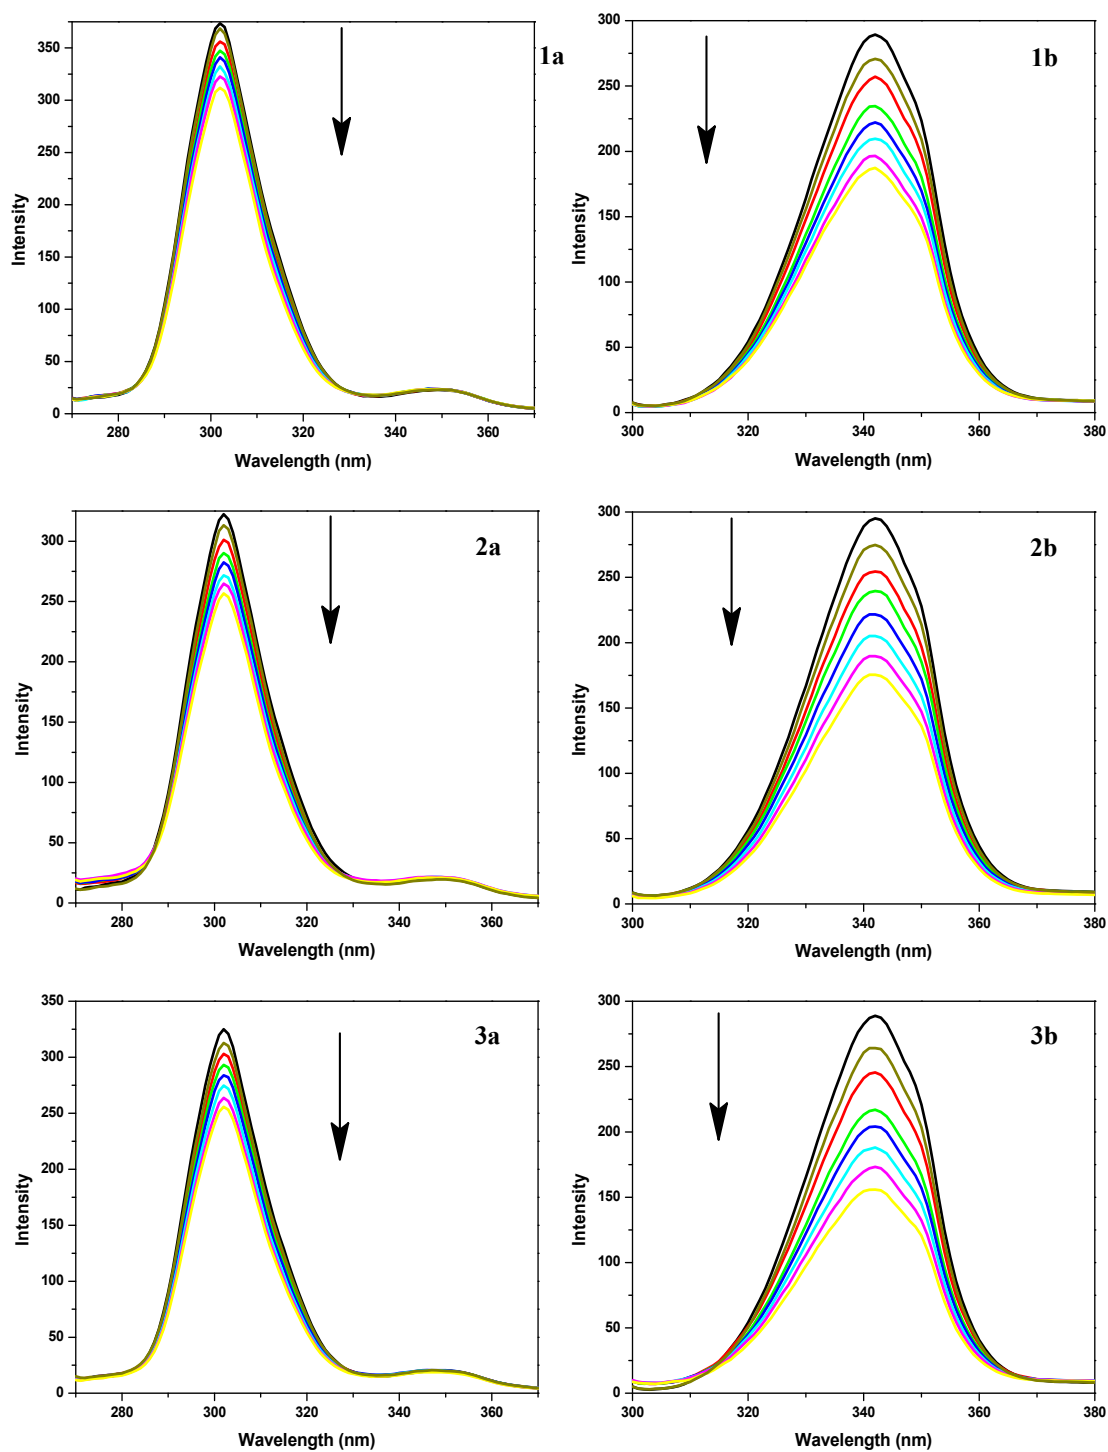

**Figure S9.** Synchronous spectra of BSA ( $1 \times 10^{-6}$  M) as a function of concentration of the ligands **1-3** ( $0, 2, 4, 6, 8, 10, 12$  and  $14 \times 10^{-7}$  M) with wavelength difference of  $\Delta\lambda = 15$  nm (a) and  $\Delta\lambda = 60$  nm (b). Arrow indicates the change in emission intensity w.r.t various concentration of the ligands.

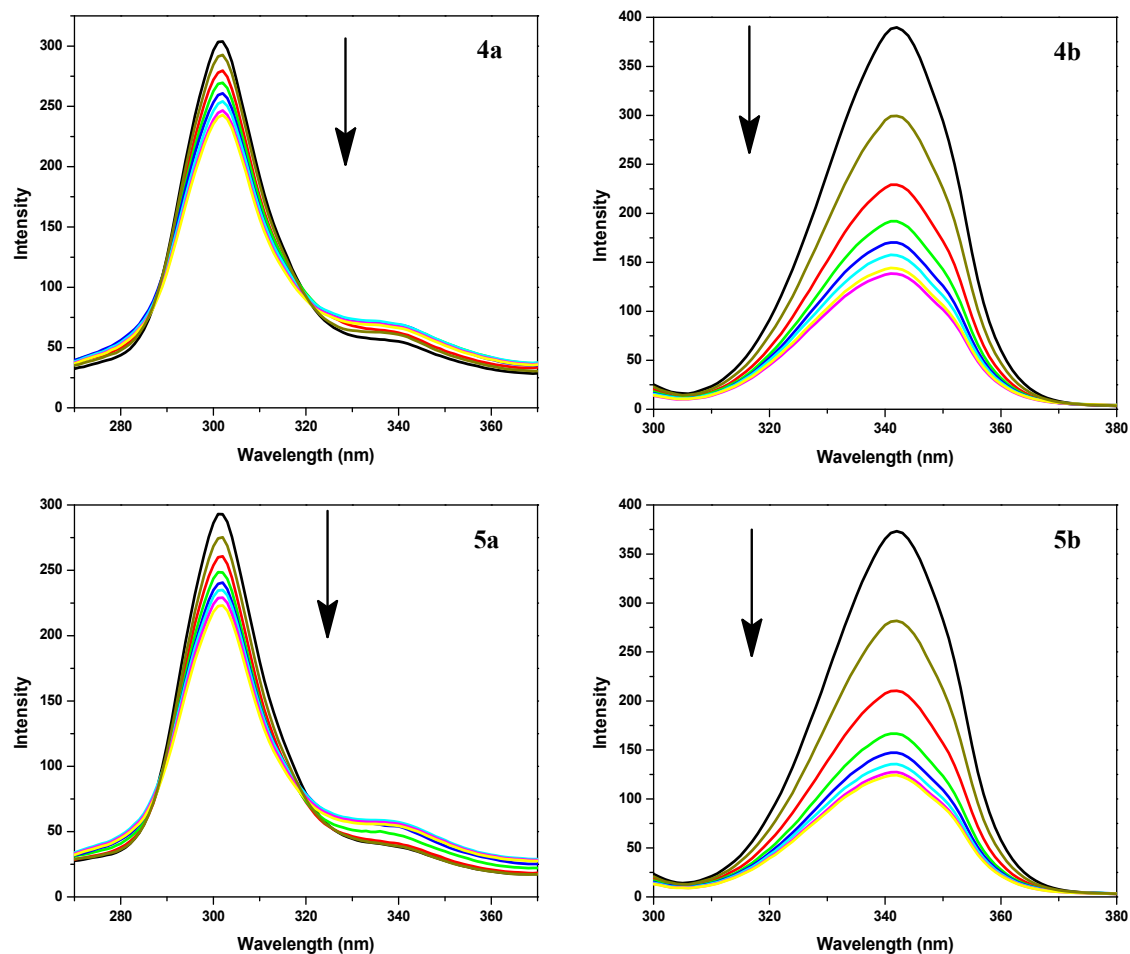

**Figure S10.** Synchronous spectra of BSA ( $1 \times 10^{-6}$  M) as a function of concentration of the complexes **4** and **5** ( $0, 2, 4, 6, 8, 10, 12$  and  $14 \times 10^{-7}$  M) with wavelength difference of  $\Delta\lambda = 15$  nm (a) and  $\Delta\lambda = 60$  nm (b). Arrow indicates the change in emission intensity w.r.t various concentration of the complexes.

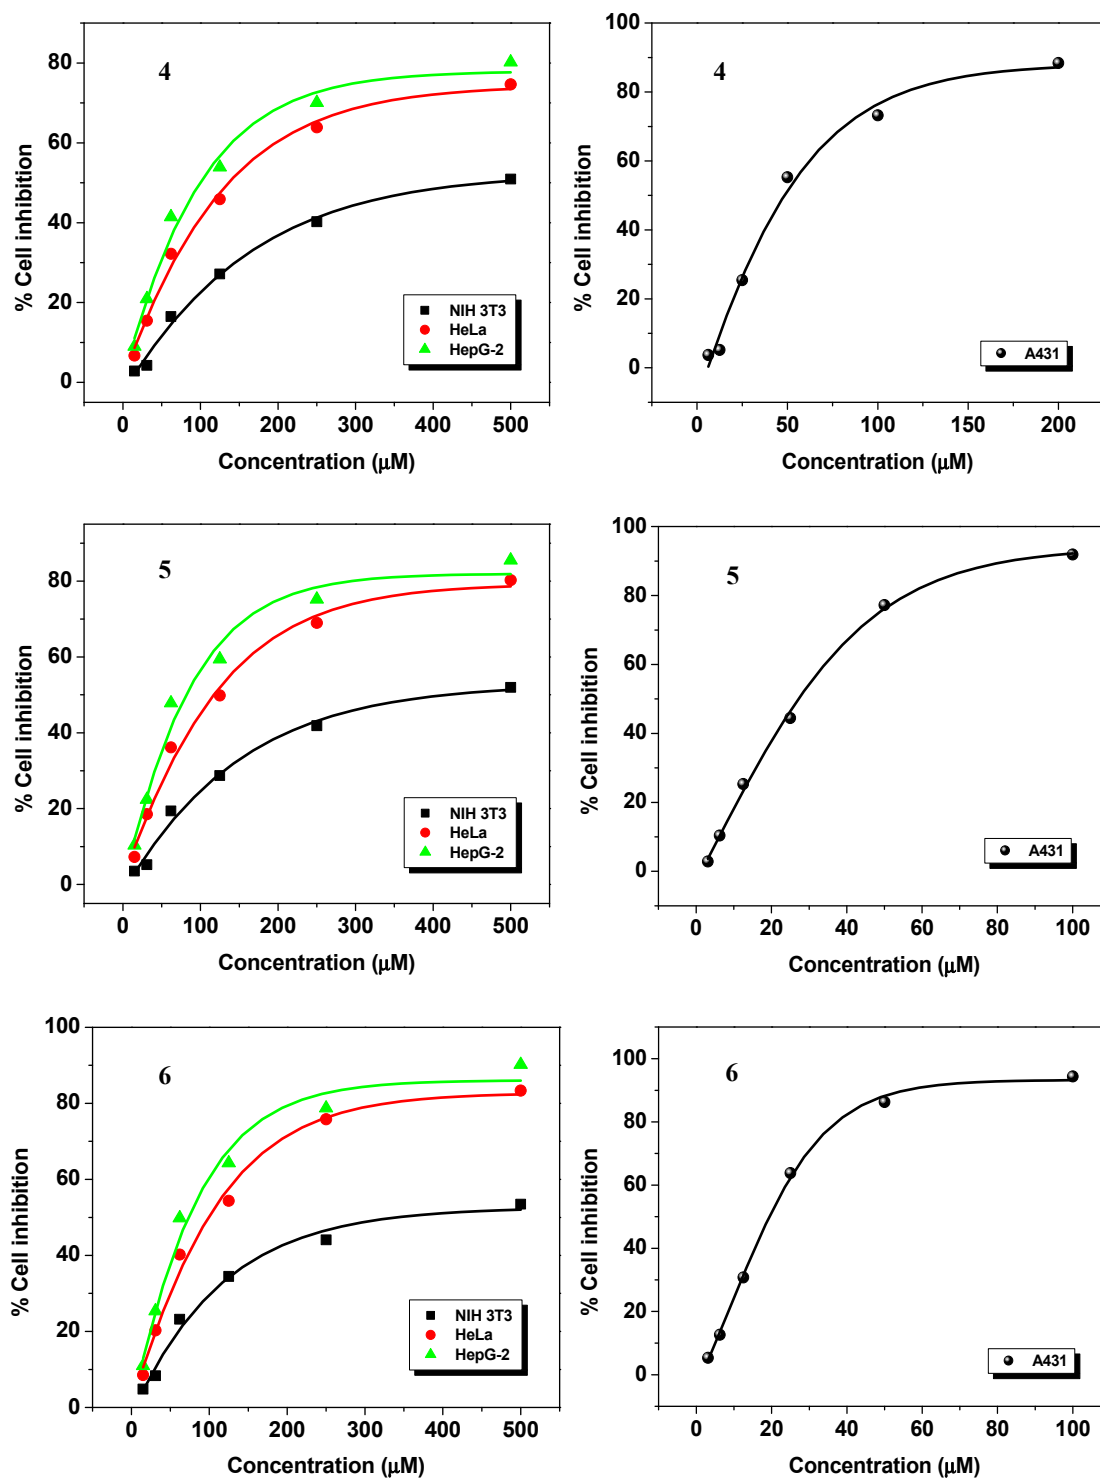

**Figure S11.** % Cell inhibition of NIH 3T3, HeLa, HepG-2 and A431 cell lines as a function of concentration of nickel hydrazones 4, 5 and 6.
